# Supplementary material for: Machine Learning Approach Using Routine Immediate Postoperative Laboratory Values for Predicting Postoperative Mortality
Source: MDPI journal article supplement (doi:10.3390/jpm11121271), 2021-12-01
Supplement: s1 [file s1]

## Supplementary Material S1: Cohort definition and concept sets.

### [JC] Surgery cohort

#### Initial Event Cohort

People having any of the following:

- a drug exposure of flurane<sup>3</sup>
- a drug exposure of propofol<sup>5</sup>

with continuous observation of at least 0 days prior and 0 days after event index date, and limit initial events to: **all events per person**.

#### Inclusion Rules

Inclusion Criteria #1: Muscle relaxant use

Having all of the following criteria:

- at least 1 occurrences of a drug exposure of Muscle relaxant <sup>4</sup>

where event starts between 1 days Before and 1 days After index start date  
**occurring within the same visit**

Inclusion Criteria #2: cardiac or brain surgery

Having all of the following criteria:

- at most 0 occurrences of a procedure of cardiac or brain surgery<sup>2</sup>

where event starts between 7 days Before and 7 days After index start date

Inclusion Criteria #3: transplant

Having all of the following criteria:

- at most 0 occurrences of a procedure of transplant<sup>7</sup>

where event starts between 7 days Before and 7 days After index start date

Limit qualifying cohort to: **all events per person**.

#### End Date Strategy

#### Date Offset Exit Criteria

This cohort definition end date will be the index event's start date plus 0 days

#### Cohort Collapse Strategy:

Collapse cohort by era with a gap size of 0 days.

#### Appendix 1: Concept Set Definitions

1. cadaveric

Show  entries

Search:

| Concept Id                 | Concept Name | Domain | Vocabulary | Excluded | Descendants | Mapped |
|----------------------------|--------------|--------|------------|----------|-------------|--------|
| No data available in table |              |        |            |          |             |        |

Showing 0 to 0 of 0 entries

PreviousNext

2. cardiac or brain surgery

Show  entries

Search:

| Concept Id | Concept Name                                                | Domain    | Vocabulary | Excluded | Descendants | Mapped |
|------------|-------------------------------------------------------------|-----------|------------|----------|-------------|--------|
| 2110581    | Cranioplasty for skull defect with reparative brain surgery | Procedure | CPT4       | NO       | YES         | NO     |
| 4010257    | Valvuloplasty of aortic valve                               | Procedure | SNOMED     | NO       | YES         | NO     |
| 4042676    | Procedure on pericardium                                    | Procedure | SNOMED     | NO       | YES         | NO     |
| 4081578    | Coronary artery atherectomy                                 | Procedure | SNOMED     | NO       | YES         | NO     |
| 4095407    | Replacement of aortic valve                                 | Procedure | SNOMED     | NO       | YES         | NO     |
| 4098191    | Replacement of tricuspid valve                              | Procedure | SNOMED     | NO       | YES         | NO     |
| 4106548    | Aortocoronary bypass of one coronary artery                 | Procedure | SNOMED     | NO       | YES         | NO     |
| 4149930    | Pericardiocentesis                                          | Procedure | SNOMED     | NO       | YES         | NO     |
| 4150819    | Operative procedure on coronary artery                      | Procedure | SNOMED     | NO       | YES         | NO     |

| Concept Id | Concept Name                   | Domain    | Vocabulary | Excluded | Descendants | Mapped |
|------------|--------------------------------|-----------|------------|----------|-------------|--------|
| 4163951    | Electrocardiographic procedure | Procedure | SNOMED     | YES      | YES         | NO     |

Showing 1 to 10 of 27 entries

Previous123Next

3. flurane

Show▼

Search:

| Concept Id | Concept Name                              | Domain | Vocabulary | Excluded | Descendants | Mapped |
|------------|-------------------------------------------|--------|------------|----------|-------------|--------|
| 743196     | enflurane                                 | Drug   | RxNorm     | NO       | YES         | NO     |
| 782043     | isoflurane                                | Drug   | RxNorm     | NO       | YES         | NO     |
| 782046     | isoflurane 999 MG/ML                      | Drug   | RxNorm     | NO       | YES         | NO     |
| 782047     | isoflurane 999 MG/ML Inhalation Solution  | Drug   | RxNorm     | NO       | YES         | NO     |
| 19002770   | desflurane                                | Drug   | RxNorm     | NO       | YES         | NO     |
| 19002793   | desflurane 1 ML/ML                        | Drug   | RxNorm     | NO       | YES         | NO     |
| 19002796   | desflurane 1000 MG/ML Inhalation Solution | Drug   | RxNorm     | NO       | YES         | NO     |
| 19039298   | sevoflurane                               | Drug   | RxNorm     | NO       | YES         | NO     |
| 40042723   | Enflurane Inhalant Solution               | Drug   | RxNorm     | NO       | YES         | NO     |
| 40050254   | Isoflurane Inhalant Solution              | Drug   | RxNorm     | NO       | YES         | NO     |

Showing 1 to 10 of 14 entries

Previous12Next

4. Muscle relaxant

Show▼ entries

Search:

| Concept Id | Concept Name    | Domain | Vocabulary | Excluded | Descendants | Mapped |
|------------|-----------------|--------|------------|----------|-------------|--------|
| 836208     | succinylcholine | Drug   | RxNorm     | NO       | YES         | NO     |
| 19003953   | rocuronium      | Drug   | RxNorm     | NO       | YES         | NO     |
| 19012598   | vecuronium      | Drug   | RxNorm     | NO       | YES         | NO     |

Showing 1 to 3 of 3 entries

[Previous](#)[1](#)[Next](#)

5. propofol

Show   entries

Search:

| Concept Id | Concept Name | Domain | Vocabulary | Excluded | Descendants | Mapped |
|------------|--------------|--------|------------|----------|-------------|--------|
| 753626     | propofol     | Drug   | RxNorm     | NO       | YES         | NO     |

Showing 1 to 1 of 1 entries

[Previous](#)[1](#)[Next](#)

6. Surgery

Show   entries

Search:

| Concept Id | Concept Name | Domain    | Vocabulary | Excluded | Descendants | Mapped |
|------------|--------------|-----------|------------|----------|-------------|--------|
| 45888085   | Surgery      | Procedure | CPT4       | NO       | YES         | NO     |

Showing 1 to 1 of 1 entries

[Previous](#)[1](#)[Next](#)

7. transplant

Show   entries

Search:

| Concept Id | Concept Name                                                                                   | Domain    | Vocabulary | Excluded | Descendants | Mapped |
|------------|------------------------------------------------------------------------------------------------|-----------|------------|----------|-------------|--------|
| 2109321    | Liver allotransplantation, orthotopic, partial or whole, from cadaver or living donor, any age | Procedure | CPT4       | NO       | YES         | NO     |
| 4208341    | Solid organ transplant                                                                         | Procedure | SNOMED     | NO       | YES         | NO     |
| 4322471    | Transplant of kidney                                                                           | Procedure | SNOMED     | NO       | YES         | NO     |

Showing 1 to 3 of 3 entries

[Previous](#)[1](#)[Next](#)

## **Supplementary Material S2:** The settings and results of experimental models.

### **RF**

\$keep\_cross\_validation\_models

[1] TRUE

\$keep\_cross\_validation\_predictions

[1] FALSE

\$keep\_cross\_validation\_fold\_assignment

[1] FALSE

\$score\_each\_iteration

[1] FALSE

\$score\_tree\_interval

[1] 0

\$fold\_assignment

[1] "Random"

\$ignore\_const\_cols

[1] TRUE

\$balance\_classes

[1] FALSE

\$max\_after\_balance\_size

[1] 5

\$max\_confusion\_matrix\_size

[1] 20

\$ntrees

[1] 100

\$max\_depth

[1] 20

\$min\_rows

[1] 1

\$nbins

[1] 30

\$nbins\_top\_level

[1] 1024

\$nbins\_cats

[1] 1024

\$r2\_stopping

[1] 1.797693e+308

\$stopping\_rounds

[1] 0

\$stopping\_metric

[1] "AUC"

\$stopping\_tolerance

[1] 0.001

\$max\_runtime\_secs

[1] 0

\$seed

[1] 29

\$build\_tree\_one\_node

[1] FALSE

\$mtries

[1] 5

\$sample\_rate

[1] 0.75

\$binomial\_double\_trees

[1] FALSE

\$col\_sample\_rate\_change\_per\_level

[1] 1

\$col\_sample\_rate\_per\_tree

[1] 1

\$min\_split\_improvement  
[1] 1e-05

\$histogram\_type  
[1] "UniformAdaptive"

\$categorical\_encoding  
[1] "Enum"

\$calibrate\_model  
[1] FALSE

\$distribution  
[1] "multinomial"

\$check\_constant\_response  
[1] TRUE

\$gainslift\_bins  
[1] -1

|                       |                        |             |                    |                       |              |              |  |
|-----------------------|------------------------|-------------|--------------------|-----------------------|--------------|--------------|--|
| \$x                   |                        |             |                    |                       |              |              |  |
| [1] "Albumin"         | "Alkaline.phosphatase" | "BUN"       | "Bilirubin..total" | "Calcium"             | "Chloride"   | "Creatinine" |  |
| [8] "GOT..AST."       | "GPT..ALT."            | "Hb"        | "Hct"              | "PLT"                 | "Phosphorus" |              |  |
| "Potassium"           |                        |             |                    |                       |              |              |  |
| [15] "Protein..total" | "Sodium"               | "Uric.Acid" | "WBC"              | "hs.CRP.quantitation" |              |              |  |

\$y  
[1] "death\_inhosp"

**XGBoost**

\$keep\_cross\_validation\_models  
[1] TRUE

\$keep\_cross\_validation\_predictions  
[1] FALSE

\$keep\_cross\_validation\_fold\_assignment  
[1] FALSE



\$score\_each\_iteration  
[1] FALSE

\$ignore\_const\_cols  
[1] TRUE

\$stopping\_rounds  
[1] 5

\$stopping\_metric  
[1] "AUC"

\$stopping\_tolerance  
[1] 1e-04

\$max\_runtime\_secs  
[1] 1.797693e+308

\$seed  
[1] 12345

\$distribution  
[1] "bernoulli"

\$tweedie\_power  
[1] 1.5

\$categorical\_encoding  
[1] "OneHotInternal"

\$quiet\_mode  
[1] TRUE

\$ntrees  
[1] 10000

\$max\_depth  
[1] 1

\$min\_rows  
[1] 1

\$min\_child\_weight

[1] 1

\$learn\_rate

[1] 0.05

\$eta

[1] 0.05

\$sample\_rate

[1] 0.8

\$subsample

[1] 0.8

\$col\_sample\_rate

[1] 0.8

\$colsample\_bylevel

[1] 0.8

\$col\_sample\_rate\_per\_tree

[1] 1

\$colsample\_bytrees

[1] 1

\$colsample\_bynode

[1] 1

\$max\_abs\_leafnode\_pred

[1] 0

\$max\_delta\_step

[1] 0

\$score\_tree\_interval

[1] 10

\$min\_split\_improvement

[1] 0

\$gamma

[1] 0

\$nthread  
[1] -1

\$build\_tree\_one\_node  
[1] FALSE

\$scalibrate\_model  
[1] FALSE

\$max\_bins  
[1] 256

\$max\_leaves  
[1] 0

\$sample\_type  
[1] "uniform"

\$normalize\_type  
[1] "tree"

\$rate\_drop  
[1] 0

\$one\_drop  
[1] FALSE

\$skip\_drop  
[1] 0

\$tree\_method  
[1] "exact"

\$grow\_policy  
[1] "depthwise"

\$booster  
[1] "gbtree"

\$reg\_lambda  
[1] 1

\$reg\_alpha  
[1] 0

\$dmatrix\_type  
[1] "dense"

\$backend  
[1] "cpu"

\$gpu\_id  
[1] 0

\$gainslift\_bins  
[1] -1

|                  |                  |                        |             |                    |                       |            |
|------------------|------------------|------------------------|-------------|--------------------|-----------------------|------------|
| \$x              |                  |                        |             |                    |                       |            |
| [1] "caseid"     | "Albumin"        | "Alkaline.phosphatase" | "BUN"       | "Bilirubin..total" | "Calcium"             | "Chloride" |
| [8] "Creatinine" | "GOT..AST."      | "GPT..ALT."            | "Hb"        | "Hct"              | "PLT"                 |            |
| "Phosphorus"     |                  |                        |             |                    |                       |            |
| [15] "Potassium" | "Protein..total" | "Sodium"               | "Uric.Acid" | "WBC"              | "hs.CRP.quantitation" |            |

\$y  
[1] "death\_inhosp"

DNN

\$keep\_cross\_validation\_models  
[1] TRUE

\$keep\_cross\_validation\_predictions  
[1] FALSE

\$keep\_cross\_validation\_fold\_assignment  
[1] FALSE

\$ignore\_const\_cols  
[1] TRUE

\$score\_each\_iteration  
[1] FALSE

\$balance\_classes  
[1] FALSE

\$max\_after\_balance\_size  
[1] 5

\$max\_confusion\_matrix\_size  
[1] 20

\$overwrite\_with\_best\_model  
[1] TRUE

\$use\_all\_factor\_levels  
[1] TRUE

\$standardize  
[1] TRUE

\$activation  
[1] "Tanh"

\$hidden  
[1] 30 30 30

\$epochs  
[1] 1

\$train\_samples\_per\_iteration  
[1] -2

\$target\_ratio\_comm\_to\_comp  
[1] 0.05

\$seed  
[1] 1234747

\$adaptive\_rate  
[1] TRUE

\$rho  
[1] 0.99

\$epsilon  
[1] 1e-08

\$rate

[1] 0.005

\$rate\_annealing

[1] 1e-06

\$rate\_decay

[1] 1

\$momentum\_start

[1] 0

\$momentum\_ramp

[1] 1e+06

\$momentum\_stable

[1] 0

\$nesterov\_accelerated\_gradient

[1] TRUE

\$input\_dropout\_ratio

[1] 0

\$l1

[1] 9.8e-05

\$l2

[1] 2.1e-05

\$max\_w2

[1] 10

\$initial\_weight\_distribution

[1] "UniformAdaptive"

\$initial\_weight\_scale

[1] 1

\$loss

[1] "Automatic"

\$distribution

[1] "bernoulli"

\$quantile\_alpha

[1] 0.5

\$tweedie\_power

[1] 1.5

\$huber\_alpha

[1] 0.9

\$score\_interval

[1] 5

\$score\_training\_samples

[1] 10000

\$score\_validation\_samples

[1] 10000

\$score\_duty\_cycle

[1] 0.025

\$classification\_stop

[1] 0

\$regression\_stop

[1] 1e-06

\$stopping\_rounds

[1] 2

\$stopping\_metric

[1] "logloss"

\$stopping\_tolerance

[1] 0.01

\$max\_runtime\_secs

[1] 327.026

\$score\_validation\_sampling

[1] "Uniform"

\$diagnostics  
[1] TRUE

\$fast\_mode  
[1] TRUE

\$force\_load\_balance  
[1] TRUE

\$variable\_importances  
[1] TRUE

\$replicate\_training\_data  
[1] TRUE

\$single\_node\_mode  
[1] FALSE

\$shuffle\_training\_data  
[1] FALSE

\$missing\_values\_handling  
[1] "MeanImputation"

\$quiet\_mode  
[1] FALSE

\$autoencoder  
[1] FALSE

\$sparse  
[1] FALSE

\$col\_major  
[1] FALSE

\$average\_activation  
[1] 0

\$sparsity\_beta  
[1] 0



\$max\_categorical\_features  
[1] 2147483647

\$reproducible  
[1] FALSE

\$export\_weights\_and\_biases  
[1] FALSE

\$mini\_batch\_size  
[1] 1

\$categorical\_encoding  
[1] "OneHotInternal"

\$elastic\_averaging  
[1] FALSE

\$elastic\_averaging\_moving\_rate  
[1] 0.9

\$elastic\_averaging\_regularization  
[1] 0.001

\$x

|                       |                        |             |                    |                       |              |              |
|-----------------------|------------------------|-------------|--------------------|-----------------------|--------------|--------------|
| [1] "Albumin"         | "Alkaline.phosphatase" | "BUN"       | "Bilirubin..total" | "Calcium"             | "Chloride"   | "Creatinine" |
| [8] "GOT..AST."       | "GPT..ALT."            | "Hb"        | "Hct"              | "PLT"                 | "Phosphorus" |              |
| "Potassium"           |                        |             |                    |                       |              |              |
| [15] "Protein..total" | "Sodium"               | "Uric.Acid" | "WBC"              | "hs.CRP.quantitation" |              |              |

\$y  
[1] "death\_inhosp"

## GLM

\$keep\_cross\_validation\_models  
[1] TRUE

\$keep\_cross\_validation\_predictions  
[1] FALSE

\$keep\_cross\_validation\_fold\_assignment

[1] FALSE

\$fold\_assignment

[1] "Random"

\$ignore\_const\_cols

[1] TRUE

\$score\_each\_iteration

[1] FALSE

\$score\_iteration\_interval

[1] -1

\$family

[1] "binomial"

\$twweedie\_variance\_power

[1] 0

\$twweedie\_link\_power

[1] 1

\$theta

[1] 1e-10

\$solver

[1] "IRLSM"

\$lambda

[1] 0.000143091

\$lambda\_search

[1] FALSE

\$early\_stopping

[1] TRUE

\$nlambdas

[1] -1

\$standardize

[1] TRUE

\$missing\_values\_handling  
[1] "MeanImputation"

\$compute\_p\_values  
[1] FALSE

\$remove\_collinear\_columns  
[1] FALSE

\$intercept  
[1] TRUE

\$non\_negative  
[1] FALSE

\$max\_iterations  
[1] 50

\$objective\_epsilon  
[1] 1e-04

\$beta\_epsilon  
[1] 1e-04

\$gradient\_epsilon  
[1] 1e-04

\$link  
[1] "logit"

\$calc\_like  
[1] FALSE

\$HGLM  
[1] FALSE

\$prior  
[1] -1

\$cold\_start  
[1] FALSE

\$lambda\_min\_ratio  
[1] 1e-04

\$max\_active\_predictors  
[1] 5000

\$obj\_reg  
[1] 0.0003487967

\$stopping\_rounds  
[1] 0

\$stopping\_metric  
[1] "AUTO"

\$stopping\_tolerance  
[1] 0.001

\$balance\_classes  
[1] FALSE

\$max\_after\_balance\_size  
[1] 5

\$max\_confusion\_matrix\_size  
[1] 20

\$max\_runtime\_secs  
[1] 0

|                       |                        |             |                    |                       |              |              |
|-----------------------|------------------------|-------------|--------------------|-----------------------|--------------|--------------|
| \$x                   |                        |             |                    |                       |              |              |
| [1] "Albumin"         | "Alkaline.phosphatase" | "BUN"       | "Bilirubin..total" | "Calcium"             | "Chloride"   | "Creatinine" |
| [8] "GOT..AST."       | "GPT..ALT."            | "Hb"        | "Hct"              | "PLT"                 | "Phosphorus" |              |
| "Potassium"           |                        |             |                    |                       |              |              |
| [15] "Protein..total" | "Sodium"               | "Uric.Acid" | "WBC"              | "hs.CRP.quantitation" |              |              |

\$y  
[1] "death\_inhosp"

**Supplementary Material S3:** A calibration plot comparing the predicted probability computed by the random forest model with the fraction of observed outcome.

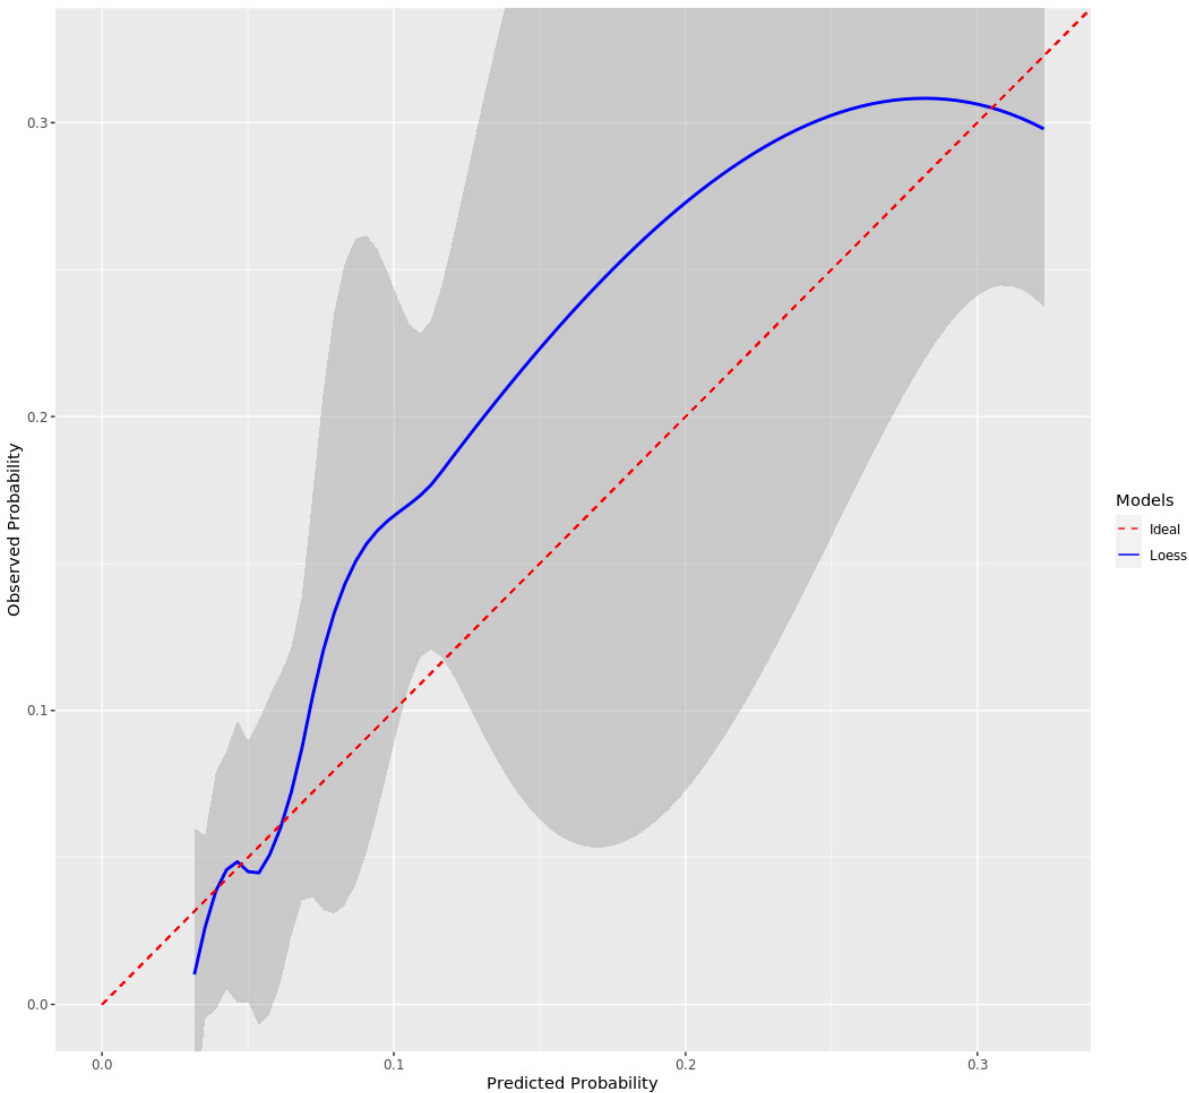

**Linear Model:**

| Intercept   | Gradient    |
|-------------|-------------|
| 0.001901101 | 0.981541599 |

**Hosmer–Lemeshow test:**

| Xsquared   | df | pvalue    |
|------------|----|-----------|
| 1 10.51912 | 8  | 0.2304626 |
